# Supplementary material
Source: Springer Nature journal article supplement (https://www.springermedizin.de/resource/supplementary/13023_2011_288_MOESM1_ESM.pdf/9642026)
Supplement: MOESM1 [file 9642026]

PubMed search: n = 5,197      ISI search: n = 1,860      EMBASE search: n = 2,554      Cochrane library search: n = 12

Total: n = 9,623

Duplicate articles excluded: n = 3,475

Titles and abstracts reviewed: n = 6,148

Not relevant to review topic: n = 6,117

Selected articles: n = 31

Low case number: n = 4

Articles that refer to results of already selected articles: n = 3

Articles that reported on ARM cases analysed in a group with other anomalies: n = 2

Included articles: n = 22

Smoking: n = 8

Occupational hazard: n = 5

Alcohol: n = 4

Illicit drugs: n = 2

Caffeine intake: n = 1

Overweight/Obesity: n = 3

Diabetes: n = 8
